# Supplementary material for: Plant Virus Genome Is Shaped by Specific Dinucleotide Restrictions That Influence Viral Infection
Source: PubMed Central journal article supplement (PMC7029135; doi:10.1128/mbio.02818-19), 2020-02-18
Supplement: mBio.02818-19-st002.pdf [file mBio.02818-19-st002.pdf]

**Table S2. Odds ratio for members of the family *Alphaflexiviridae***

| Genus          | ID          | Abrev.               | Name                              | AA     | AF     | AC     | AG     | TA     | TT     | TC     | RG     | GA     | GT     | CC     | CA     | GC     | GG     | Size   | A      | T    | C    | G    |      |      |
|----------------|-------------|----------------------|-----------------------------------|--------|--------|--------|--------|--------|--------|--------|--------|--------|--------|--------|--------|--------|--------|--------|--------|------|------|------|------|------|
| Alphavirus     | KY094958.1  | AVS                  | Zika virus S                      | 1.0202 | 0.844  | 1.0022 | 1.0077 | 0.7809 | 1.2411 | 0.8025 | 1.0796 | 1.2226 | 1.1208 | 0.962  | 0.7618 | 1.0097 | 0.8113 | 1.0772 | 0.9988 | 3549 | 0.29 | 0.21 | 0.30 | 0.21 |
|                | KX058461.1  | AVV                  | Azovul virus                      | 1.0188 | 0.845  | 1.0081 | 1.0077 | 0.6660 | 1.2511 | 0.8659 | 1.2819 | 1.1688 | 1.0978 | 0.9793 | 0.7651 | 1.061  | 0.8352 | 1.021  | 0.9983 | 7989 | 0.29 | 0.21 | 0.29 | 0.22 |
|                | JN053261.1  | BVE                  | Blackberry virus E                | 0.9458 | 0.8481 | 1.0703 | 1.1504 | 0.7096 | 1.1635 | 1.0027 | 1.2009 | 1.2083 | 1.1067 | 0.9136 | 0.7741 | 1.0317 | 0.886  | 1.0353 | 1.0102 | 7718 | 0.27 | 0.20 | 0.31 | 0.22 |
|                | AB010940.1  | GVA                  | Garlic virus A                    | 1.0451 | 0.8074 | 1.0039 | 1.0376 | 0.7676 | 1.1205 | 0.9793 | 1.2289 | 1.034  | 1.2104 | 0.889  | 0.7604 | 1.118  | 0.8295 | 1.0552 | 0.8847 | 8657 | 0.28 | 0.23 | 0.29 | 0.20 |
|                | KM073441.1  | GVB                  | Garlic virus B                    | 0.9266 | 0.9076 | 1.0078 | 0.9804 | 0.7287 | 1.1708 | 0.9796 | 1.2443 | 1.1582 | 1.0992 | 0.8885 | 0.85   | 1.123  | 0.8377 | 1.008  | 1.0057 | 8196 | 0.30 | 0.23 | 0.25 | 0.21 |
|                | AB010943.1  | GVC                  | Garlic virus C                    | 1.0047 | 0.8613 | 1.1402 | 1.0657 | 0.6915 | 1.2323 | 0.9078 | 1.3009 | 1.1794 | 1.0661 | 0.8799 | 0.8282 | 1.0996 | 0.8606 | 1.0535 | 0.9429 | 8405 | 0.30 | 0.23 | 0.27 | 0.21 |
|                | MF555553.1  | GVD                  | Garlic virus D                    | 1.0024 | 0.8114 | 1.1478 | 1.0098 | 0.7615 | 1.1762 | 0.865  | 1.3389 | 1.088  | 1.1594 | 0.9470 | 0.7798 | 1.1558 | 0.885  | 0.9964 | 0.9356 | 8424 | 0.30 | 0.22 | 0.27 | 0.21 |
|                | AJ253221.1  | GVE                  | Garlic virus E                    | 0.9745 | 0.8757 | 1.1181 | 1.0011 | 0.7648 | 1.177  | 0.9135 | 1.2711 | 1.0976 | 1.099  | 0.9632 | 0.8318 | 1.1729 | 0.8656 | 0.9741 | 0.9398 | 8451 | 0.29 | 0.22 | 0.28 | 0.22 |
|                | U88241.1    | GVX                  | Garlic virus X                    | 0.9836 | 0.9336 | 1.092  | 0.9841 | 0.7467 | 1.241  | 0.9108 | 1.2622 | 1.1848 | 1.0129 | 0.8444 | 0.8444 | 1.1042 | 0.8228 | 1.0909 | 0.9294 | 8106 | 0.31 | 0.23 | 0.26 | 0.21 |
|                | MF072561.1  | SVX                  | Shallot virus X                   | 1.0251 | 0.881  | 1.0542 | 1.0028 | 0.7088 | 1.1553 | 1.0118 | 1.2199 | 1.1138 | 1.1334 | 0.8998 | 0.838  | 1.0584 | 0.8143 | 1.0514 | 0.9817 | 8881 | 0.29 | 0.22 | 0.29 | 0.21 |
| MF550291.1     | VVV         | Vanilla latent virus | 0.9747                            | 0.9329 | 1.0437 | 1.0261 | 0.7257 | 1.17   | 1.004  | 1.0887 | 1.1889 | 1.0686 | 0.9683 | 0.8507 | 1.0678 | 0.838  | 0.9484 | 1.0277 | 7862   | 0.33 | 0.22 | 0.28 | 0.19 |      |
| Luteovirus     | EJ488641.1  | LUV                  | Luteum latent virus               | 0.9277 | 0.9376 | 1.019  | 1.1241 | 0.7999 | 1.1158 | 0.9631 | 1.2365 | 1.0777 | 1.131  | 1.0085 | 0.8386 | 1.051  | 0.8102 | 0.999  | 1.1024 | 7674 | 0.28 | 0.20 | 0.28 | 0.23 |
|                | CP313246.1  | CVVCV                | Citrus yellow vein clearing virus | 1.0298 | 0.822  | 1.0783 | 0.9228 | 0.7551 | 1.2131 | 0.9634 | 1.2876 | 1.0077 | 1.2415 | 0.9463 | 0.8224 | 1.116  | 0.9282 | 1.0152 | 1.1003 | 7531 | 0.28 | 0.21 | 0.32 | 0.19 |
| Mandarinivirus | AF607441.1  | MDV                  | Indian citrus ringpoot virus      | 1.0429 | 0.8812 | 1.0839 | 0.9244 | 0.7129 | 1.0258 | 1.0598 | 1.115  | 1.0786 | 1.1566 | 0.9177 | 0.8621 | 1.0121 | 0.810  | 0.984  | 1.0641 | 7560 | 0.28 | 0.20 | 0.32 | 0.20 |
|                | KC232241.1  | DDSV                 | Dodder orchard symptomless virus  | 1.0634 | 1.038  | 0.9856 | 0.9295 | 0.6820 | 1.0458 | 1.1838 | 1.1341 | 1.0981 | 1.0436 | 0.883  | 1.0212 | 1.1377 | 0.8369 | 1.0177 | 0.9271 | 7838 | 0.26 | 0.20 | 0.33 | 0.23 |
| Potyvirus      | RF872420.1  | ActVX                | Actinidia virus X                 | 1.0089 | 0.8278 | 1.0388 | 1.1117 | 0.7024 | 1.0952 | 0.9638 | 1.3299 | 1.1623 | 1.1687 | 0.9583 | 0.8883 | 1.0644 | 0.8877 | 1.0488 | 0.9645 | 6888 | 0.27 | 0.22 | 0.30 | 0.21 |
|                | FG02020.1   | AVXV                 | Adium virus X                     | 1.058  | 0.9356 | 1.0002 | 1.0566 | 0.6263 | 1.0273 | 1.0906 | 1.1786 | 1.1443 | 1.1754 | 0.8687 | 0.77   | 1.1513 | 0.9268 | 0.9065 | 1.0519 | 7118 | 0.28 | 0.21 | 0.31 | 0.20 |
| Tombusvirus    | AF62304.1   | AMV                  | Alternanthera mosaic virus        | 1.0610 | 0.9087 | 0.8516 | 1.2004 | 0.5478 | 1.2255 | 1.175  | 1.0986 | 1.2048 | 1.0885 | 1.0481 | 0.8046 | 1.1077 | 0.7784 | 0.9467 | 1.1598 | 6607 | 0.27 | 0.22 | 0.33 | 0.22 |
|                | AB03061.1   | AVXV                 | Albizia virus X                   | 1.1078 | 0.8423 | 1.0029 | 0.9838 | 0.6446 | 1.1646 | 1.0954 | 1.2599 | 1.1227 | 1.081  | 0.9466 | 0.8407 | 1.0384 | 0.9727 | 0.9854 | 1.0271 | 7009 | 0.29 | 0.21 | 0.35 | 0.19 |
| Tymovirus      | NC_009616.1 | AVZ                  | Asparagus virus 3                 | 1.1149 | 0.9377 | 0.9884 | 0.9745 | 0.6907 | 1.006  | 1.128  | 1.1425 | 1.0833 | 1.0741 | 0.9434 | 0.9243 | 1.126  | 0.977  | 0.9751 | 1.0508 | 6935 | 0.24 | 0.21 | 0.35 | 0.21 |
|                | Q65017.1    | BMV                  | Bamboo mosaic virus               | 1.0584 | 0.8771 | 1.0411 | 0.9683 | 0.7522 | 1.1777 | 0.9822 | 1.2258 | 1.0867 | 1.1811 | 0.9669 | 0.7471 | 1.0202 | 0.7486 | 1.0045 | 1.1932 | 8386 | 0.30 | 0.19 | 0.30 | 0.21 |
| Tymovirus      | AF093382.1  | CVX                  | Calceola virus X                  | 1.0617 | 0.8787 | 0.947  | 1.121  | 0.6849 | 1.064  | 1.1685 | 1.2097 | 1.1533 | 1.1206 | 0.9714 | 0.8586 | 1.1105 | 0.7468 | 0.9279 | 1.2216 | 6614 | 0.27 | 0.20 | 0.30 | 0.23 |
|                | U01941.1    | CCMV                 | Cassava common mosaic virus       | 1.0658 | 0.8745 | 0.9533 | 1.054  | 0.5523 | 1.1384 | 1.1285 | 1.2912 | 1.2348 | 1.0306 | 0.9598 | 0.8629 | 1.0653 | 0.8768 | 1.0344 | 1.1574 | 6376 | 0.31 | 0.22 | 0.32 | 0.22 |
| Tymovirus      | HY08481.1   | CVX                  | Cassava virus X                   | 1.0553 | 0.95   | 0.9358 | 1.0611 | 0.7375 | 1.0876 | 0.9711 | 1.2887 | 1.1284 | 1.1685 | 1.0977 | 0.8622 | 1.064  | 0.7597 | 1.0445 | 1.1348 | 5879 | 0.28 | 0.24 | 0.31 | 0.21 |
|                | U01941.1    | CCMV                 | Cassava common mosaic virus       | 1.0658 | 0.8745 | 0.9533 | 1.054  | 0.5523 | 1.1384 | 1.1285 | 1.2912 | 1.2348 | 1.0306 | 0.9598 | 0.8629 | 1.0653 | 0.8768 | 1.0344 | 1.1574 | 6376 | 0.31 | 0.22 | 0.32 | 0.22 |
| Tymovirus      | U01941.1    | CCMV                 | Cassava common mosaic virus       | 1.0658 | 0.8745 | 0.9533 | 1.054  | 0.5523 | 1.1384 | 1.1285 | 1.2912 | 1.2348 | 1.0306 | 0.9598 | 0.8629 | 1.0653 | 0.8768 | 1.0344 | 1.1574 | 6376 | 0.31 | 0.22 | 0.32 | 0.22 |
|                | U01941.1    | CCMV                 | Cassava common mosaic virus       | 1.0658 | 0.8745 | 0.9533 | 1.054  | 0.5523 | 1.1384 | 1.1285 | 1.2912 | 1.2348 | 1.0306 | 0.9598 | 0.8629 | 1.0653 | 0.8768 | 1.0344 | 1.1574 | 6376 | 0.31 | 0.22 | 0.32 | 0.22 |
| Tymovirus      | U01941.1    | CCMV                 | Cassava common mosaic virus       | 1.0658 | 0.8745 | 0.9533 | 1.054  | 0.5523 | 1.1384 | 1.1285 | 1.2912 | 1.2348 | 1.0306 | 0.9598 | 0.8629 | 1.0653 | 0.8768 | 1.0344 | 1.1574 | 6376 | 0.31 | 0.22 | 0.32 | 0.22 |
|                | U01941.1    | CCMV                 | Cassava common mosaic virus       | 1.0658 | 0.8745 | 0.9533 | 1.054  | 0.5523 | 1.1384 | 1.1285 | 1.2912 | 1.2348 | 1.0306 | 0.9598 | 0.8629 | 1.0653 | 0.8768 | 1.0344 | 1.1574 | 6376 | 0.31 | 0.22 | 0.32 | 0.22 |
| Tymovirus      | U01941.1    | CCMV                 | Cassava common mosaic virus       | 1.0658 | 0.8745 | 0.9533 | 1.054  | 0.5523 | 1.1384 | 1.1285 | 1.2912 | 1.2348 | 1.0306 | 0.9598 | 0.8629 | 1.0653 | 0.8768 | 1.0344 | 1.1574 | 6376 | 0.31 | 0.22 | 0.32 | 0.22 |
|                | U01941.1    | CCMV                 | Cassava common mosaic virus       | 1.0658 | 0.8745 | 0.9533 | 1.054  | 0.5523 | 1.1384 | 1.1285 | 1.2912 | 1.2348 | 1.0306 | 0.9598 | 0.8629 | 1.0653 | 0.8768 | 1.0344 | 1.1574 | 6376 | 0.31 | 0.22 | 0.32 | 0.22 |
| Tymovirus      | U01941.1    | CCMV                 | Cassava common mosaic virus       | 1.0658 | 0.8745 | 0.9533 | 1.054  | 0.5523 | 1.1384 | 1.1285 | 1.2912 | 1.2348 | 1.0306 | 0.9598 | 0.8629 | 1.0653 | 0.8768 | 1.0344 | 1.1574 | 6376 | 0.31 | 0.22 | 0.32 | 0.22 |
|                | U01941.1    | CCMV                 | Cassava common mosaic virus       | 1.0658 | 0.8745 | 0.9533 | 1.054  | 0.5523 | 1.1384 | 1.1285 | 1.2912 | 1.2348 | 1.0306 | 0.9598 | 0.8629 | 1.0653 | 0.8768 | 1.0344 | 1.1574 | 6376 | 0.31 | 0.22 | 0.32 | 0.22 |
| Tymovirus      | U01941.1    | CCMV                 | Cassava common mosaic virus       | 1.0658 | 0.8745 | 0.9533 | 1.054  | 0.5523 | 1.1384 | 1.1285 | 1.2912 | 1.2348 | 1.0306 | 0.9598 | 0.8629 | 1.0653 | 0.8768 | 1.0344 | 1.1574 | 6376 | 0.31 | 0.22 | 0.32 | 0.22 |
|                | U01941.1    | CCMV                 | Cassava common mosaic virus       | 1.0658 | 0.8745 | 0.9533 | 1.054  | 0.5523 | 1.1384 | 1.1285 | 1.2912 | 1.2348 | 1.0306 | 0.9598 | 0.8629 | 1.0653 | 0.8768 | 1.0344 | 1.1574 | 6376 | 0.31 | 0.22 | 0.32 | 0.22 |
| Tymovirus      | U01941.1    | CCMV                 | Cassava common mosaic virus       | 1.0658 | 0.8745 | 0.9533 | 1.054  | 0.5523 | 1.1384 | 1.1285 | 1.2912 | 1.2348 | 1.0306 | 0.9598 | 0.8629 | 1.0653 | 0.8768 | 1.0344 | 1.1574 | 6376 | 0.31 | 0.22 | 0.32 | 0.22 |
|                | U01941.1    | CCMV                 | Cassava common mosaic virus       | 1.0658 | 0.8745 | 0.9533 | 1.054  | 0.5523 | 1.1384 | 1.1285 | 1.2912 | 1.2348 | 1.0306 | 0.9598 | 0.8629 | 1.0653 | 0.8768 | 1.0344 | 1.1574 | 6376 | 0.31 | 0.22 | 0.32 | 0.22 |
| Tymovirus      | U01941.1    | CCMV                 | Cassava common mosaic virus       | 1.0658 | 0.8745 | 0.9533 | 1.054  | 0.5523 | 1.1384 | 1.1285 | 1.2912 | 1.2348 | 1.0306 | 0.9598 | 0.8629 | 1.0653 | 0.8768 | 1.0344 | 1.1574 | 6376 | 0.31 | 0.22 | 0.32 | 0.22 |
|                | U01941.1    | CCMV                 | Cassava common mosaic virus       | 1.0658 | 0.8745 | 0.9533 | 1.054  | 0.5523 | 1.1384 | 1.1285 | 1.2912 | 1.2348 | 1.0306 | 0.9598 | 0.8629 | 1.0653 | 0.8768 | 1.0344 | 1.1574 | 6376 | 0.31 | 0.22 | 0.32 | 0.22 |
| Tymovirus      | U01941.1    | CCMV                 | Cassava common mosaic virus       | 1.0658 | 0.8745 | 0.9533 | 1.054  | 0.5523 | 1.1384 | 1.1285 | 1.2912 | 1.2348 | 1.0306 | 0.9598 | 0.8629 | 1.0653 | 0.8768 | 1.0344 | 1.1574 | 6376 | 0.31 | 0.22 | 0.32 | 0.22 |
|                | U01941.1    | CCMV                 | Cassava common mosaic virus       | 1.0658 | 0.8745 | 0.9533 | 1.054  | 0.5523 | 1.1384 | 1.1285 | 1.2912 | 1.2348 | 1.0306 | 0.9598 | 0.8629 | 1.0653 | 0.8768 | 1.0344 | 1.1574 | 6376 | 0.31 | 0.22 | 0.32 | 0.22 |
| Tymovirus      | U01941.1    | CCMV                 | Cassava common mosaic virus       | 1.0658 | 0.8745 | 0.9533 | 1.054  | 0.5523 | 1.1384 | 1.1285 | 1.2912 | 1.2348 | 1.0306 | 0.9598 | 0.8629 | 1.0653 | 0.8768 | 1.0344 | 1.1574 | 6376 | 0.31 | 0.22 | 0.32 | 0.22 |
|                | U01941.1    | CCMV                 | Cassava common mosaic virus       | 1.0658 | 0.8745 | 0.9533 | 1.054  | 0.5523 | 1.1384 | 1.1285 |        |        |        |        |        |        |        |        |        |      |      |      |      |      |
