# Supplementary material for: Plant Virus Genome Is Shaped by Specific Dinucleotide Restrictions That Influence Viral Infection
Source: PubMed Central journal article supplement (PMC7029135; doi:10.1128/mbio.02818-19), 2020-02-18
Supplement: mBio.02818-19-st003.pdf [file mBio.02818-19-st003.pdf]

**Table S3.** Odds ratio for members of the family *Closteroviridae*

| Genus         | ID                                  | Name     | Proportiones nucleótidos |        |        |        |        |        |        |        |        |        |        |        | Significance | Values |        |        |        |      |      |      |      |
|---------------|-------------------------------------|----------|--------------------------|--------|--------|--------|--------|--------|--------|--------|--------|--------|--------|--------|--------------|--------|--------|--------|--------|------|------|------|------|
|               |                                     |          | A                        | C      | G      | T      | U      | C      | G      | A      | C      | G      | T      | U      |              |        |        |        |        |      |      |      |      |
| Amegilovirus  | KC05450.1                           | BVAV     | 1.0174                   | 0.7944 | 1.125  | 1.1133 | 0.9127 | 1.096  | 1.0187 | 0.9745 | 0.9587 | 1.0748 | 0.9544 | 0.9909 | 0.9661       | 1.0615 | 0.9001 | 0.9233 | 0.8643 | 0.26 | 0.27 | 0.20 | 0.28 |
|               | JO23121.1                           | GLAV1    | 1.0944                   | 0.9127 | 1.0073 | 0.9923 | 0.8639 | 1.149  | 1.0916 | 0.9161 | 0.9218 | 0.943  | 0.9999 | 1.2792 | 1.036        | 0.9699 | 1.0345 | 1.0024 | 0.8659 | 0.27 | 0.28 | 0.18 | 0.27 |
|               | AF07328.2                           | GLAV3    | 1.0537                   | 0.8382 | 1.0027 | 1.0407 | 0.9405 | 1.1540 | 1.0052 | 0.8854 | 0.9702 | 0.9897 | 0.9234 | 1.0962 | 1.0209       | 1.0283 | 0.9583 | 1.0018 | 0.8659 | 0.26 | 0.28 | 0.20 | 0.27 |
|               | F86755.1                            | GLAV6    | 1.1156                   | 0.9388 | 1.008  | 1.0502 | 0.8699 | 1.2161 | 1.12   | 1.0377 | 1.08   | 1.0588 | 0.9944 | 0.8698 | 1.154        | 0.9365 | 0.9507 | 0.9995 | 0.8659 | 0.29 | 0.28 | 0.19 | 0.24 |
|               | LC05212.1                           | GLAV13   | 1.0459                   | 1.0095 | 0.9313 | 1.0024 | 0.8664 | 1.1343 | 1.1581 | 0.8793 | 1.0217 | 0.9337 | 0.8775 | 1.1807 | 1.0677       | 0.9565 | 1.031  | 0.971  | 0.8659 | 0.29 | 0.26 | 0.21 | 0.24 |
|               | AF15156.1                           | LCV2     | 1.136                    | 0.769  | 1.1424 | 1.0152 | 0.7991 | 1.1304 | 1.1138 | 1.0314 | 1.0156 | 1.0446 | 0.961  | 0.9352 | 1.1288       | 1.0911 | 0.8659 | 0.9909 | 0.8659 | 0.29 | 0.20 | 0.18 | 0.23 |
|               | AF141125.3                          | PMWAV1   | 1.0703                   | 0.8629 | 1.0284 | 1.047  | 0.7763 | 1.0594 | 1.0708 | 1.0344 | 1.0238 | 1.0332 | 0.986  | 0.9402 | 1.1439       | 0.9556 | 0.9959 | 0.9504 | 0.8659 | 0.29 | 0.27 | 0.18 | 0.24 |
|               | AF28110.2                           | PMWAV2   | 0.9719                   | 0.9516 | 1.1189 | 0.9998 | 1.082  | 1.0279 | 0.8532 | 0.9846 | 0.888  | 0.9991 | 0.8791 | 1.2104 | 1.0198       | 1.0228 | 1.1203 | 0.8659 | 0.8659 | 0.28 | 0.29 | 0.18 | 0.25 |
|               | DF09929.2                           | PMWAV3   | 1.0615                   | 0.8589 | 1.1277 | 0.9869 | 0.7891 | 1.1217 | 1.0438 | 1.0915 | 1.005  | 1.021  | 0.9917 | 0.9742 | 1.1605       | 1.0227 | 1.0922 | 0.9423 | 0.8659 | 0.29 | 0.27 | 0.19 | 0.25 |
|               | FF54464.1                           | PuBIRSVW | 1.1541                   | 0.8421 | 1.044  | 1.0003 | 0.8698 | 1.0751 | 1.0905 | 1.0984 | 1.0535 | 1.0524 | 0.868  | 1.1788 | 0.9651       | 0.7821 | 1.0462 | 0.8659 | 0.8659 | 0.27 | 0.32 | 0.19 | 0.23 |
| Closterovirus | US393.1                             | BVSV     | 1.1474                   | 0.7246 | 1.1247 | 1.0301 | 0.8146 | 1.1798 | 1.045  | 0.9766 | 0.8564 | 1.1138 | 0.8813 | 1.1443 | 1.1615       | 1.0338 | 0.9039 | 0.8643 | 0.8643 | 0.28 | 0.27 | 0.21 | 0.24 |
|               | K74746.1                            | BVY      | 0.8588                   | 0.8689 | 1.1222 | 0.9542 | 0.8685 | 1.2622 | 1.1052 | 0.9162 | 0.9655 | 1.062  | 0.8148 | 1.1443 | 1.2271       | 1.0386 | 0.9168 | 0.8476 | 0.8643 | 0.25 | 0.29 | 0.21 | 0.24 |
|               | GU234166.1                          | CanEV    | 1.1144                   | 0.75   | 1.1304 | 0.947  | 0.7495 | 1.2051 | 1.063  | 0.974  | 0.9201 | 0.9479 | 0.9798 | 1.3561 | 1.126        | 1.0813 | 0.9687 | 0.8654 | 0.8654 | 0.27 | 0.29 | 0.22 | 0.23 |
|               | F86882.1                            | CarV     | 1.1313                   | 0.7968 | 0.9437 | 0.9425 | 0.8569 | 1.2215 | 1.176  | 0.8844 | 0.8531 | 0.9977 | 0.9458 | 1.2481 | 1.1825       | 0.9588 | 0.8961 | 0.9456 | 0.8649 | 0.27 | 0.28 | 0.24 | 0.21 |
|               | US393.1                             | CTV      | 1.1579                   | 0.8094 | 1.1657 | 0.9251 | 0.8609 | 1.1045 | 1.09   | 0.9392 | 0.8291 | 0.9884 | 0.9017 | 1.0888 | 1.1207       | 1.071  | 0.8638 | 0.9683 | 0.8649 | 0.24 | 0.30 | 0.20 | 0.25 |
|               | AF51628.1                           | GLAV2    | 1.0408                   | 0.9231 | 0.962  | 0.9954 | 0.7555 | 1.1739 | 1.0911 | 0.9702 | 0.8833 | 0.9981 | 0.9701 | 1.2883 | 1.1325       | 0.9816 | 1.095  | 0.8613 | 0.8649 | 0.25 | 0.29 | 0.21 | 0.24 |
|               | AF73420.1                           | MV1      | 1.1936                   | 0.8466 | 1.0734 | 0.9102 | 0.7223 | 1.0888 | 1.2253 | 0.9713 | 0.8979 | 1.0001 | 0.781  | 1.2985 | 1.2397       | 1.0368 | 0.8567 | 0.8411 | 0.8649 | 0.25 | 0.29 | 0.23 | 0.23 |
|               | DC057128.1                          | RSV      | 1.2397                   | 0.8076 | 0.9821 | 1.0576 | 0.7601 | 1.1037 | 1.1638 | 0.9793 | 0.8313 | 1.085  | 0.9496 | 1.1039 | 1.224        | 0.9659 | 0.9402 | 0.9683 | 0.8649 | 0.24 | 0.31 | 0.25 | 0.25 |
|               | K74800.1                            | RollAV   | 1.1574                   | 0.8361 | 1.0711 | 0.9825 | 0.7468 | 1.1047 | 0.9838 | 1.1297 | 0.8669 | 1.069  | 1.0165 | 0.9205 | 1.15         | 0.9793 | 0.8395 | 0.9338 | 0.8649 | 0.24 | 0.29 | 0.21 | 0.26 |
|               | DG08089.1                           | SCAV     | 1.103                    | 0.8223 | 1.0388 | 1.0828 | 0.8291 | 1.1141 | 1.0155 | 1.0422 | 1.0076 | 1.1479 | 0.9064 | 0.8663 | 1.0972       | 0.9499 | 1.0552 | 0.9456 | 0.8649 | 0.28 | 0.31 | 0.21 | 0.26 |
| Chilivirus    | KY03917.1                           | TYV      | 1.1423                   | 0.7862 | 1.09   | 1.0    | 0.7663 | 1.1460 | 1.1094 | 1.0188 | 0.9519 | 1.0231 | 0.8748 | 1.1202 | 1.1728       | 1.0246 | 0.8677 | 0.8674 | 0.8659 | 0.28 | 0.29 | 0.21 | 0.23 |
|               | NC_018561.1 NC_018561.1             | BVDV     | 1.0541                   | 0.9508 | 0.9829 | 0.9172 | 0.717  | 1.0876 | 1.1061 | 1.2588 | 1.2429 | 0.9093 | 1.139  | 0.858  | 1.1411       | 0.9563 | 0.9599 | 1.0193 | 0.8659 | 0.34 | 0.30 | 0.16 | 0.20 |
|               | NC_005212.1 NC_005212.2             | BVDV     | 1.0999                   | 0.8669 | 1.0351 | 0.9864 | 0.8688 | 1.1624 | 1.2503 | 1.0886 | 1.0941 | 0.9074 | 0.8717 | 0.9242 | 1.0386       | 0.922  | 0.8488 | 0.9437 | 0.8659 | 0.30 | 0.29 | 0.19 | 0.21 |
|               | NC_009612.1 NC_009612.1             | BVDV     | 1.0146                   | 0.9063 | 0.961  | 1.11   | 0.7137 | 1.0751 | 1.1886 | 1.1445 | 1.149  | 1.003  | 1.0513 | 0.8688 | 1.0751       | 0.9395 | 0.7358 | 0.9448 | 0.8659 | 0.30 | 0.31 | 0.17 | 0.21 |
|               | NC_040953.1 NC_040953.1             | CHSDV    | 1.0538                   | 0.9749 | 0.9884 | 0.9619 | 0.7623 | 1.0888 | 1.0911 | 1.1611 | 1.1407 | 0.9396 | 1.1359 | 0.9604 | 1.1483       | 0.9621 | 0.7865 | 0.9834 | 0.8659 | 0.31 | 0.30 | 0.16 | 0.21 |
|               | NC_018761.1 NC_018761.1             | DENV     | 1.0713                   | 0.9602 | 0.9585 | 1.0002 | 0.7464 | 1.0861 | 1.1394 | 1.1339 | 1.0352 | 1.0494 | 1.1213 | 0.7505 | 1.0887       | 0.9302 | 0.9566 | 0.9605 | 0.8659 | 0.33 | 0.31 | 0.16 | 0.20 |
|               | NC_012061.1 NC_012061.1             | LCV      | 1.0397                   | 0.8803 | 0.9868 | 0.9705 | 0.7527 | 1.0486 | 1.1279 | 1.2234 | 1.1755 | 0.9327 | 1.1334 | 0.9059 | 1.1474       | 1.0173 | 0.7284 | 0.9581 | 0.8649 | 0.33 | 0.31 | 0.17 | 0.21 |
|               | NC_008171.1 NC_008171.1             | DFVV     | 0.9968                   | 0.9551 | 0.9914 | 1.0762 | 0.8382 | 1.1038 | 1.1046 | 1.0482 | 1.1042 | 0.9587 | 1.0649 | 0.9269 | 1.105        | 0.9715 | 0.860  | 0.9799 | 0.8659 | 0.30 | 0.30 | 0.15 | 0.20 |
|               | NC_006611.1 NC_006611.1 NC_006611.1 | PCV      | 1.0428                   | 0.9739 | 0.9368 | 0.9541 | 0.7293 | 1.0486 | 1.0469 | 1.1818 | 1.0996 | 1.0457 | 1.0613 | 0.8688 | 1.0371       | 0.9621 | 0.7383 | 0.8679 | 0.8659 | 0.34 | 0.30 | 0.17 | 0.20 |
|               | NC_005981.1 NC_005981.2             | SPW      | 1.0888                   | 0.972  | 0.8745 | 1.031  | 0.7079 | 1.1198 | 1.1701 | 1.1199 | 1.035  | 1.0117 | 1.1609 | 0.7947 | 1.2841       | 0.8496 | 0.7965 | 0.967  | 0.8649 | 0.31 | 0.31 | 0.17 | 0.21 |
| Vetivirus     | NC_018211.1 NC_018211.1             | SFVSV    | 1.0091                   | 0.9172 | 1.0439 | 1.0373 | 0.7817 | 1.0741 | 1.125  | 1.098  | 1.0439 | 0.8811 | 1.0219 | 0.8695 | 0.9382       | 1.0172 | 0.8686 | 0.8649 | 0.8649 | 0.30 | 0.32 | 0.16 | 0.23 |
|               | NC_007461.1 NC_007461.1             | TCV      | 1.0249                   | 0.9268 | 1.0611 | 0.9801 | 0.7979 | 1.0649 | 1.0881 | 1.1744 | 1.1091 | 0.9917 | 1.0613 | 0.9729 | 1.126        | 1.0427 | 0.9059 | 0.9588 | 0.8649 | 0.34 | 0.29 | 0.16 | 0.21 |
|               | NC_012041.1 NC_012041.1             | TCV      | 1.0201                   | 0.9244 | 1.0706 | 0.9677 | 0.7638 | 1.0943 | 1.0884 | 1.071  | 1.0738 | 0.988  | 1.0252 | 0.9091 | 1.2027       | 0.9856 | 0.9204 | 0.9589 | 0.8649 | 0.28 | 0.32 | 0.17 | 0.23 |
|               | NC_018211.1 NC_018211.1             | SFVSV    | 1.0091                   | 0.9172 | 1.0439 | 1.0373 | 0.7817 | 1.0741 | 1.125  | 1.098  | 1.0439 | 0.8811 | 1.0219 | 0.8695 | 0.9382       | 1.0172 | 0.8686 | 0.8649 | 0.8649 | 0.30 | 0.32 | 0.16 | 0.23 |
|               | NC_007461.1 NC_007461.1             | TCV      | 1.0249                   | 0.9268 | 1.0611 | 0.9801 | 0.7979 | 1.0649 | 1.0881 | 1.1744 | 1.1091 | 0.9917 | 1.0613 | 0.9729 | 1.126        | 1.0427 | 0.9059 | 0.9588 | 0.8649 | 0.34 | 0.29 | 0.16 | 0.21 |
|               | NC_012041.1 NC_012041.1             | TCV      | 1.0201                   | 0.9244 | 1.0706 | 0.9677 | 0.7638 | 1.0943 | 1.0884 | 1.071  | 1.0738 | 0.988  | 1.0252 | 0.9091 | 1.2027       | 0.9856 | 0.9204 | 0.9589 | 0.8649 | 0.28 | 0.32 | 0.17 | 0.23 |
|               | NC_018211.1 NC_018211.1             | SFVSV    | 1.0091                   | 0.9172 | 1.0439 | 1.0373 | 0.7817 | 1.0741 | 1.125  | 1.098  | 1.0439 | 0.8811 | 1.0219 | 0.8695 | 0.9382       | 1.0172 | 0.8686 | 0.8649 | 0.8649 | 0.30 | 0.32 | 0.16 | 0.23 |
|               | NC_007461.1 NC_007461.1             | TCV      | 1.0249                   | 0.9268 | 1.0611 | 0.9801 | 0.7979 | 1.0649 | 1.0881 | 1.1744 | 1.1091 | 0.9917 | 1.0613 | 0.9729 | 1.126        | 1.0427 | 0.9059 | 0.9588 | 0.8649 | 0.34 | 0.29 | 0.16 | 0.21 |
|               | NC_012041.1 NC_012041.1             | TCV      | 1.0201                   | 0.9244 | 1.0706 | 0.9677 | 0.7638 | 1.0943 | 1.0884 | 1.071  | 1.0738 | 0.988  | 1.0252 | 0.9091 | 1.2027       | 0.9856 | 0.9204 | 0.9589 | 0.8649 | 0.28 | 0.32 | 0.17 | 0.23 |
|               | NC_018211.1 NC_018211.1             | SFVSV    | 1.0091                   | 0.9172 | 1.0439 | 1.0373 | 0.7817 | 1.0741 | 1.125  | 1.098  | 1.0439 | 0.8811 | 1.0219 | 0.8695 | 0.9382       | 1.0172 | 0.8686 | 0.8649 | 0.8649 | 0.30 | 0.32 | 0.16 | 0.23 |
| Unknown       | NC_018211.1 NC_018211.1             | CV1      | 1.0107                   | 0.9002 | 1.0402 | 0.9269 | 0.7209 | 1.178  | 1.0762 | 1.0511 | 1.1139 | 0.9032 | 0.8955 | 0.8849 | 1.184        | 0.9431 | 0.8142 | 0.9062 | 0.8649 | 0.39 | 0.31 | 0.16 | 0.18 |
|               | NC_018211.1 NC_018211.1             | CV2      | 1.1105                   | 0.8919 | 1.0307 | 0.9209 | 0.7243 | 1.1915 | 1.0964 | 1.052  | 1.0868 | 0.9613 | 0.9427 | 0.954  | 1.1576       | 0.9069 | 0.8303 | 1.0086 | 0.8649 | 0.39 | 0.31 | 0.16 | 0.19 |
|               | NC_018211.1 NC_018211.1             | CV3      | 1.1191                   | 0.8859 | 0.9967 | 0.9811 | 0.741  | 1.2065 | 1.0819 | 1.0515 | 1.0407 | 0.9663 | 1.0813 | 0.9103 | 1.1985       | 0.8792 | 0.7992 | 1.0217 | 0.8649 | 0.34 | 0.32 | 0.16 | 0.19 |
|               | NC_018211.1 NC_018211.1             | CV4      | 1.0506                   | 0.974  | 0.9141 | 0.9203 | 0.7214 | 1.1301 | 1.1346 |        |        |        |        |        |              |        |        |        |        |      |      |      |      |
