# Supplementary material for: Plant Virus Genome Is Shaped by Specific Dinucleotide Restrictions That Influence Viral Infection
Source: PubMed Central journal article supplement (PMC7029135; doi:10.1128/mbio.02818-19), 2020-02-18
Supplement: mBio.02818-19-st005.pdf [file mBio.02818-19-st005.pdf]

Table S5: composition of different PPV-derived fragments

| Region | Sequence           | Size (bp) | G+C content | Total changes | Sequence identity | CpG freq | CpG total (change) | CpG O/E ratio | UpA freq | UpA total (change) | UpA O/E ratio | ApU freq | ApU total (change) | ApU O/E ratio | Codon usage |                  |
|--------|--------------------|-----------|-------------|---------------|-------------------|----------|--------------------|---------------|----------|--------------------|---------------|----------|--------------------|---------------|-------------|------------------|
|        |                    |           |             |               |                   |          |                    |               |          |                    |               |          |                    |               | CAI         | Enc <sub>0</sub> |
| F1     | Native             | 966       | 44.6%       | -             | -                 | 0.031    | 30 (-)             | 0.626         | 0.031    | 30 (-)             | 0.409         | 0.080    | 77 (-)             | 1.050         | 0.750       | 53.44            |
|        | Permuted           | 966       | 44.5%       | 116           | 88.0%             | 0.031    | 30 (0)             | 0.629         | 0.032    | 31 (+1)            | 0.420         | 0.090    | 76 (-1)            | 1.031         | 0.754       | 55.61            |
| F2     | Native             | 930       | 44.1%       | -             | -                 | 0.043    | 40 (-)             | 0.888         | 0.041    | 38 (-)             | 0.528         | 0.064    | 59 (-)             | 0.820         | 0.731       | 55.77            |
|        | Permuted           | 930       | 44.2%       | 113           | 87.8%             | 0.043    | 40 (0)             | 0.883         | 0.040    | 37 (-1)            | 0.517         | 0.065    | 60 (+1)            | 0.838         | 0.733       | 55.37            |
| F3     | Native             | 1233      | 44.0%       | -             | -                 | 0.033    | 40 (-)             | 0.669         | 0.036    | 44 (-)             | 0.470         | 0.073    | 90 (-)             | 0.960         | 0.754       | 53.94            |
|        | Permuted           | 1233      | 44.2%       | 150           | 87.8%             | 0.033    | 40 (0)             | 0.669         | 0.036    | 44 (0)             | 0.470         | 0.073    | 90 (0)             | 0.961         | 0.750       | 55.47            |
|        | CpG_low            | 1233      | 42.2%       | 51            | 95.7%             | 0.000    | 0 (-40)            | 0.000         | 0.036    | 44 (0)             | 0.435         | 0.080    | 99 (+9)            | 0.978         | 0.792       | 46.18            |
|        | UpA_low            | 1233      | 46.5%       | 32            | 97.4%             | 0.033    | 40 (0)             | 0.608         | 0.010    | 12 (-32)           | 0.139         | 0.067    | 82 (-8)            | 0.950         | 0.748       | 48.91            |
|        | CpG_high           | 1233      | 53.3%       | 127           | 89.7%             | 0.136    | 167 (+127)         | 1.922         | 0.036    | 44 (0)             | 0.666         | 0.060    | 74 (-16)           | 1.121         | 0.608       | 41.06            |
|        | UpA_high           | 1233      | 38.9%       | 113           | 90.8%             | 0.033    | 40 (0)             | 0.888         | 0.127    | 157 (+113)         | 1.373         | 0.092    | 113 (+23)          | 0.988         | 0.744       | 43.95            |
| F4     | Native             | 975       | 43.0%       | -             | -                 | 0.027    | 26 (-)             | 0.591         | 0.045    | 44 (-)             | 0.556         | 0.067    | 65 (-)             | 0.822         | 0.776       | 52.31            |
|        | Permuted           | 975       | 42.7%       | 128           | 86.9%             | 0.027    | 26 (0)             | 0.591         | 0.045    | 44 (0)             | 0.556         | 0.068    | 65 (0)             | 0.822         | 0.773       | 53.65            |
|        | CpG_low            | 975       | 40.8%       | 30            | 96.9%             | 0.001    | 1 (-25)            | 0.025         | 0.045    | 44 (0)             | 0.516         | 0.073    | 71 (+6)            | 0.833         | 0.806       | 42.42            |
|        | UpA_low            | 975       | 45.6%       | 32            | 96.7%             | 0.027    | 26 (0)             | 0.521         | 0.012    | 12 (-32)           | 0.168         | 0.060    | 58 (-7)            | 0.811         | 0.764       | 49.12            |
|        | CpG_high           | 975       | 51.6%       | 97            | 90.1%             | 0.126    | 123 (+97)          | 1.919         | 0.045    | 44 (0)             | 0.777         | 0.051    | 50 (-15)           | 0.883         | 0.606       | 42.96            |
|        | UpA_high           | 975       | 37.9%       | 79            | 91.9%             | 0.027    | 26 (0)             | 0.767         | 0.126    | 123 (+79)          | 1.315         | 0.093    | 91 (+26)           | 0.973         | 0.758       | 43.54            |
|        | UpA_high_M_fixed   | 975       | 42.7%       | 121           | 87.6%             | 0.027    | 26 (0)             | 0.591         | 0.107    | 104 (+60)          | 1.315         | 0.076    | 74 (+9)            | 0.935         | 0.722       | 49.67            |
|        | U+A_high_UpA_fixed | 975       | 38.0%       | 136           | 86.1%             | 0.021    | 20 (-6)            | 0.586         | 0.045    | 44 (0)             | 0.047         | 0.092    | 90 (+25)           | 0.966         | 0.792       | 44.83            |
|        | ApU_high_UpA_fixed | 975       | 40.4%       | 49            | 95.0%             | 0.021    | 20 (-6)            | 0.520         | 0.045    | 44 (0)             | 0.509         | 0.108    | 104 (+39)          | 1.215         | 0.800       | 43.52            |
| F4.1   | Native             | 459       | 43.4%       | -             | -                 | 0.024    | 11 (-)             | 0.511         | 0.052    | 24 (-)             | 0.662         | 0.066    | 30 (-)             | 0.826         | 0.828       | 50.61            |
|        | UpA_high           | 459       | 39.0%       | 34            | 92.6%             | 0.024    | 11 (0)             | 0.633         | 0.127    | 58 (+34)           | 1.382         | 0.094    | 43 (+13)           | 1.024         | 0.755       | 48.14            |
| F4.2   | Native             | 516       | 42.3%       | -             | -                 | 0.029    | 15 (-)             | 0.683         | 0.039    | 20 (-)             | 0.468         | 0.066    | 34 (-)             | 0.795         | 0.779       | 55.89            |
|        | UpA_high           | 516       | 36.7%       | 45            | 91.3%             | 0.029    | 15 (0)             | 0.926         | 0.126    | 65 (+45)           | 1.263         | 0.091    | 47 (+17)           | 0.914         | 0.760       | 45.77            |
| F5     | Native             | 828       | 42.5%       | -             | -                 | 0.028    | 23 (-)             | 0.617         | 0.051    | 42 (-)             | 0.616         | 0.088    | 73 (-)             | 1.070         | 0.782       | 51.12            |
|        | Permuted           | 828       | 42.5%       | 100           | 87.9%             | 0.028    | 23 (0)             | 0.617         | 0.051    | 42 (0)             | 0.616         | 0.088    | 73 (0)             | 1.070         | 0.733       | 51.89            |
