# Supplementary material for: Plant Virus Genome Is Shaped by Specific Dinucleotide Restrictions That Influence Viral Infection
Source: PubMed Central journal article supplement (PMC7029135; doi:10.1128/mbio.02818-19), 2020-02-18
Supplement: mBio.02818-19-st006.pdf [file mBio.02818-19-st006.pdf]

**Table S6:** list of primers used in this study

| <b>Name</b> | <b>Sequence (5'-3')</b>                                |
|-------------|--------------------------------------------------------|
| <b>2806</b> | GACCCTGATGTTGATGTTTCGCT                                |
| <b>2807</b> | GAGGGATTTGAAGAGAGATTC                                  |
| <b>3340</b> | TCACAAGCAAATTTGGAACG                                   |
| <b>3341</b> | GCATTAATGTTGCGTCACGA                                   |
| <b>3344</b> | AGCGCAACATATCCAGTTGA                                   |
| <b>3345</b> | CACCAATGTCCCATTCTTCC                                   |
| <b>3364</b> | CGAAGTCCACAACCACATCA                                   |
| <b>3365</b> | TGATGTGGTTGTGGACTTCG                                   |
| <b>3392</b> | GAGTGCTCTAAATAAGGACGC                                  |
| <b>3393</b> | GCGTCCTTATTTAGAGCACTC                                  |
| <b>3463</b> | GCAGCTTTCCTGACAACCTT                                   |
| <b>3464</b> | CCACAGAGTCCGTTTAC                                      |
| <b>3465</b> | AGCACTCTTTTGGTATGC                                     |
| <b>3466</b> | CAATTTGAACGTGCTG                                       |
| <b>3467</b> | TCTACCTTCTCTTTAGGGC                                    |
| <b>3513</b> | GGGACAAGTTTGTACAAAAAGCAGGCTTACCCATCGTGAGCACTCGAGAT     |
| <b>3514</b> | GGGGACCACTTTGTACAAGAAAGCTGGGTCTCAGTAAATCCATCCTTCTGGCAG |
| <b>3519</b> | AGACTTGAACGGACTCGAC                                    |
| <b>3520</b> | AGTGCTCACGATGGGTAAG                                    |
| <b>3527</b> | TAGAGCTCGAATTTCCC                                      |
| <b>3528</b> | ACCCATCTCATAAATAACGTC                                  |
