# Supplementary material for: Plant Virus Genome Is Shaped by Specific Dinucleotide Restrictions That Influence Viral Infection
Source: mBio. 2020 Feb 18;11(1):e02818-19. doi: 10.1128/mBio.02818-19 (PMC7029135; doi:10.1128/mBio.02818-19)
Supplement: TABLE S4 [file mBio.02818-19-st004.pdf]

Table S4. Odds ratio for members of the family *Bromoviridae*

| Genus              | ID                               | Accession | Name                               | AA       | AT       | AC       | AG      | TA       | TT       | TC       | TA      | CA       | CT       | CC       | CG       | GA       | GT       | GC       | GG       | Size     | A    | T    | C    | G    |
|--------------------|----------------------------------|-----------|------------------------------------|----------|----------|----------|---------|----------|----------|----------|---------|----------|----------|----------|----------|----------|----------|----------|----------|----------|------|------|------|------|
| Alfamovirus        | K07708.1/AF0613.1/AF01572.1      | AMV       | Alfalfa mosaic virus               | 1.1276   | 1.006    | 0.8314   | 0.9895  | 0.7276   | 1.001    | 1.0811   | 1.1281  | 0.8647   | 0.9901   | 1.148    | 0.9161   | 1.2308   | 0.8615   | 0.9639   | 0.9194   | 8274     | 0.28 | 0.28 | 0.31 | 0.22 |
|                    | AB741113.1/AB741114.1/AB741115.1 | AIMMV     | Amazon lily mild mottle virus      | 1.3074   | 0.8602   | 0.9751   | 0.983   | 0.7375   | 1.0189   | 1.0709   | 1.0692  | 0.8837   | 1.1133   | 0.9823   | 0.8665   | 1.1251   | 1.0004   | 0.9537   | 0.9093   | 8206     | 0.29 | 0.31 | 0.31 | 0.25 |
|                    | AJ27327.1/AF771028.1/AF771029.1  | FEV       | Philoponema montae spot virus      | 1.1502   | 1.0803   | 0.9721   | 1.0028  | 0.6666   | 1.0701   | 1.1219   | 1.1317  | 0.9108   | 1.0699   | 0.9964   | 0.8934   | 1.1143   | 0.9523   | 0.8805   | 0.9113   | 8477     | 0.30 | 0.30 | 0.31 | 0.25 |
| Bromovirus         | HM6281.1/HA64713.1/HA62158.1     | BBMV      | Broad bean mottle virus            | 1.1787   | 0.9107   | 0.8022   | 0.9828  | 0.7424   | 1.0409   | 1.11     | 1.1588  | 0.8713   | 1.0228   | 1.0603   | 0.9509   | 1.1272   | 1.0281   | 0.9428   | 0.8625   | 8250     | 0.30 | 0.29 | 0.30 | 0.23 |
|                    | AF0242.1/AF01478.1/AF02360.1     | BMV       | Brome mosaic virus                 | 1.0821   | 0.9059   | 0.9548   | 1.0537  | 0.7592   | 1.0289   | 1.07     | 1.1566  | 0.8813   | 1.128    | 0.932    | 0.8883   | 1.1958   | 0.9571   | 0.9769   | 0.8662   | 8210     | 0.28 | 0.28 | 0.31 | 0.25 |
|                    | MG8301.1/FA03018.1/FA03135.1     | CCMV      | Cassia yellow blotchy virus        | 1.0938   | 0.9123   | 0.9395   | 1.0432  | 0.7201   | 1.0424   | 1.073    | 1.1387  | 0.9259   | 1.1396   | 1.0823   | 1.1858   | 1.0006   | 0.9644   | 0.9159   | 0.9071   | 8138     | 0.30 | 0.29 | 0.31 | 0.24 |
|                    | AB134808.1/AB134807.1/AB134808.1 | CVBV      | Cowpea chlorotic mottle virus      | 1.1807   | 0.8289   | 0.9022   | 1.0807  | 0.6471   | 1.1122   | 1.1539   | 1.1261  | 0.9778   | 1.0999   | 1.1006   | 0.8262   | 1.2278   | 0.9748   | 0.846    | 0.9117   | 7988     | 0.27 | 0.28 | 0.31 | 0.25 |
|                    | AB444038.1/AB444038.1/AB444038.1 | MYV       | Melanthera yellow fleck virus      | 1.1063   | 0.9388   | 0.926    | 1.0099  | 0.8118   | 1.080    | 1.0602   | 1.0813  | 0.9232   | 1.0451   | 1.1307   | 0.9281   | 1.0844   | 0.9739   | 0.8577   | 0.9272   | 8305     | 0.28 | 0.30 | 0.31 | 0.23 |
| Cucumovirus        | AB444038.1/AB444038.1/AB444038.1 | SEV       | Spring beauty latent virus         | 1.1577   | 0.9688   | 0.8777   | 1.0344  | 0.7816   | 1.0932   | 1.0783   | 1.0767  | 0.8805   | 1.1108   | 1.1034   | 0.9783   | 1.2234   | 0.9807   | 0.9645   | 0.9895   | 8363     | 0.30 | 0.30 | 0.31 | 0.24 |
|                    | FM481309.1/PM481306.1/PM481301.1 | GMV       | Gayfeather mild mottle virus       | 1.1123   | 0.8702   | 1.068    | 0.9907  | 0.7475   | 1.0452   | 1.0922   | 1.1333  | 0.9668   | 0.9745   | 1.0079   | 1.0611   | 1.2082   | 1.118    | 0.7947   | 0.8332   | 8499     | 0.26 | 0.27 | 0.34 | 0.23 |
|                    | U127308.1/AF02378.1/AF02381.1    | PSV       | Peasoot stunt virus                | 1.0987   | 0.9257   | 0.8742   | 1.0239  | 0.8182   | 0.9999   | 1.0666   | 1.1247  | 0.9482   | 1.0604   | 1.0078   | 0.8862   | 1.1686   | 1.0144   | 0.8553   | 0.9483   | 8492     | 0.22 | 0.26 | 0.22 | 0.23 |
|                    | A077358.1/AF0544.1/AF0546.1      | SNV       | Tomato aspermy virus               | 1.0515   | 1.0971   | 1.0045   | 1.0297  | 0.7573   | 0.9355   | 1.1221   | 1.1297  | 0.9987   | 0.9887   | 1.0051   | 0.9974   | 1.0943   | 1.1586   | 0.8507   | 0.9251   | 8670     | 0.30 | 0.29 | 0.32 | 0.22 |
|                    | JM463346.1/JM463341.1/JM463342.1 | AgV       | Agaratum latent virus              | 1.1115   | 0.9781   | 0.969    | 0.9691  | 0.7144   | 1.0874   | 0.9911   | 1.086   | 0.9668   | 0.9326   | 1.0309   | 0.854    | 1.291    | 0.9638   | 0.7882   | 0.8614   | 8377     | 0.30 | 0.31 | 0.31 | 0.22 |
| Ilarivirus         | AF745038.1/AF745035.1/AF745036.1 | AmPV      | American gum leaf pattern virus    | 1.1028   | 0.9225   | 1.0009   | 0.9716  | 0.6886   | 1.1782   | 1.125    | 1.002   | 0.9445   | 0.9328   | 1.1283   | 1.0474   | 1.0404   | 0.9391   | 0.7947   | 0.8935   | 7850     | 0.29 | 0.30 | 0.30 | 0.26 |
|                    | AF745034.1/AF745031.1/AF745036.1 | AgMV      | Apple mosaic virus                 | 0.9735   | 1.0387   | 0.9568   | 1.0303  | 0.657    | 1.1940   | 1.1576   | 1.068   | 0.9029   | 0.8858   | 1.1556   | 1.1025   | 1.0394   | 0.8527   | 0.7825   | 0.8221   | 8511     | 0.29 | 0.27 | 0.31 | 0.27 |
|                    | EU919606.1/EU919607.1/AF05952.1  | AV2       | Asparagus virus 2                  | 1.1051   | 1.0393   | 0.8771   | 0.9541  | 0.6876   | 1.0786   | 0.8864   | 1.0693  | 1.0348   | 0.934    | 1.3004   | 0.7891   | 1.0516   | 0.9109   | 0.9039   | 0.9069   | 8853     | 0.27 | 0.30 | 0.30 | 0.23 |
|                    | DQ091519.1/DQ091519.1/DQ091519.2 | BCV       | Blackberry chlorotic ringpot virus | 1.1142   | 1.0203   | 0.949    | 0.8818  | 0.6746   | 1.0989   | 1.008    | 1.0666  | 0.9979   | 0.858    | 1.2492   | 0.97     | 0.9792   | 0.9707   | 0.8405   | 0.9395   | 8647     | 0.30 | 0.30 | 0.30 | 0.23 |
|                    | AF031007.1/AF031008.1/AF031009.1 | BSV       | Blueberry shock virus              | 1.0016   | 0.9644   | 1.0129   | 1.0092  | 0.7743   | 1.1679   | 1.0699   | 1.0104  | 0.8623   | 0.9181   | 1.2028   | 1.1044   | 1.0644   | 0.9048   | 0.793    | 0.8774   | 7889     | 0.28 | 0.29 | 0.31 | 0.25 |
|                    | U17308.1/AF05718.1/AF05718.1     | CRV       | Crimson red rugose virus           | 1.0511   | 1.0713   | 0.9496   | 0.9778  | 0.7226   | 1.0809   | 1.0091   | 1.0548  | 0.9515   | 0.866    | 1.2308   | 0.9521   | 1.0451   | 0.9376   | 0.8550   | 0.8607   | 8607     | 0.27 | 0.29 | 0.31 | 0.23 |
|                    | EP584654.1/EP584655.1/AF02789.1  | CVV       | Crisis contagion virus             | 1.1346   | 1.0334   | 0.8687   | 0.9142  | 0.6696   | 1.1003   | 1.0315   | 1.2272  | 0.9733   | 0.9171   | 1.2524   | 0.9174   | 1.2002   | 0.9024   | 0.8951   | 0.8781   | 8656     | 0.30 | 0.30 | 0.30 | 0.23 |
|                    | U34850.1/AF07047.1/AF0599.1      | EMV       | Elm mottle virus                   | 1.0738   | 1.0262   | 0.8853   | 0.9873  | 0.6706   | 1.0995   | 1.0212   | 1.2276  | 1.0283   | 0.9039   | 1.2874   | 0.8318   | 1.2961   | 0.9334   | 0.8507   | 0.8869   | 8620     | 0.27 | 0.29 | 0.31 | 0.24 |
|                    | AF062028.1/AF070771.1/AF070772.1 | FCV       | Fragaria chiloensis latent virus   | 1.08     | 0.9868   | 0.9641   | 0.959   | 0.7039   | 1.0803   | 1.0244   | 1.1783  | 1.047    | 0.8961   | 1.2149   | 1.074    | 1.0389   | 0.9796   | 1.0302   | 0.8971   | 8485     | 0.25 | 0.32 | 0.31 | 0.24 |
|                    | AF050208.1/AF050207.1/AF050208.1 | HIV       | Humulus japonicus latent virus     | 1.0873   | 1.0557   | 0.7979   | 1.01    | 0.7671   | 1.0877   | 0.9919   | 1.1893  | 0.9758   | 1.0067   | 1.2886   | 0.7862   | 1.1913   | 0.8199   | 1.0713   | 0.9258   | 8130     | 0.29 | 0.29 | 0.31 | 0.23 |
|                    | FM46008.1/JM46008.1/AF07356.1    | LCO       | Lotus leaf chlorotic virus         | 1.0405   | 0.8975   | 1.0634   | 1.0315  | 0.6448   | 1.2485   | 1.1129   | 1.0414  | 0.9474   | 0.9229   | 1.093    | 1.0028   | 1.0303   | 0.9141   | 0.7862   | 0.8557   | 8261     | 0.29 | 0.28 | 0.30 | 0.25 |
|                    | AF06008.1/JM46008.1/AF05146.1    | PMV       | Paratoma mottle virus              | 1.0734   | 1.0061   | 1.0006   | 0.9144  | 0.6452   | 1.1058   | 1.06     | 1.2096  | 0.9857   | 0.8655   | 1.1611   | 1.0348   | 1.0401   | 0.9837   | 0.7983   | 0.8214   | 8708     | 0.27 | 0.28 | 0.30 | 0.25 |
|                    | KF72008.1/KF72008.1/KF72008.1    | PRV       | Prunet ringpot virus               | 1.0735   | 1.0126   | 0.9648   | 0.9287  | 0.6345   | 1.1051   | 1.0752   | 1.2708  | 1.1231   | 0.8602   | 1.1994   | 0.9054   | 1.0135   | 0.9647   | 0.8206   | 0.8138   | 8418     | 0.28 | 0.30 | 0.30 | 0.22 |
|                    | AF77708.1/AF77708.1/AF77708.1    | PRSV      | Prunus dwarf virus                 | 1.1138   | 0.9331   | 0.9183   | 0.9413  | 0.6918   | 1.109    | 1.0206   | 1.2624  | 1.105    | 1.0099   | 1.2774   | 0.798    | 1.2713   | 0.9382   | 0.7804   | 0.9176   | 8096     | 0.30 | 0.31 | 0.31 | 0.22 |
|                    | AF738034.1/AF738033.1/AF738034.1 | PRNV      | Prunus necrotic ringpot virus      | 0.9826   | 0.9634   | 1.0362   | 1.0354  | 0.7885   | 1.1206   | 1.0351   | 1.0917  | 0.9124   | 0.8839   | 1.2007   | 1.0723   | 1.0486   | 0.9957   | 0.76893  | 0.8021   | 7880     | 0.27 | 0.28 | 0.31 | 0.25 |
| Obolavirus         | U05108.1/U05108.1/U05108.1       | SV        | Spiraea latent virus               | 1.0841   | 1.0058   | 0.9308   | 0.8996  | 0.7211   | 1.0408   | 0.9674   | 1.2383  | 1.0033   | 0.9188   | 1.3008   | 0.8441   | 1.1449   | 0.9979   | 0.9287   | 0.8816   | 8668     | 0.27 | 0.30 | 0.31 | 0.24 |
|                    | AF061828.1/AF061831.1/AF061818.1 | SNV       | Strawberry necrotic shock virus    | 1.0525   | 1.0641   | 0.9705   | 0.8753  | 0.6832   | 1.0604   | 1.0572   | 1.3127  | 1.0791   | 0.8847   | 1.2439   | 0.8831   | 1.2229   | 0.9424   | 0.8349   | 0.832    | 8550     | 0.30 | 0.30 | 0.31 | 0.23 |
|                    | KF77708.1/KF77708.1/KF77708.1    | TSV       | Tomato necrotic streak virus       | 1.0506   | 1.1001   | 0.8709   | 1.0398  | 0.722    | 1.0712   | 0.9919   | 1.4868  | 1.0953   | 0.8833   | 1.3018   | 0.798    | 1.0852   | 0.8822   | 0.8893   | 0.8908   | 8621     | 0.28 | 0.29 | 0.31 | 0.23 |
| Obolavirus         | U07108.1/U07108.1/U07108.1       | TSMV      | Tomato apple mosaic virus          | 1.1139   | 1.0513   | 0.9711   | 0.9747  | 0.6803   | 1.0913   | 0.9688   | 1.2199  | 1.0317   | 0.8972   | 1.2646   | 0.8638   | 0.9515   | 0.9393   | 0.917    | 0.823    | 8625     | 0.30 | 0.30 | 0.31 | 0.24 |
|                    | KF72008.1/AF72008.1/AF72008.1    | TSV       | Tobacco streak virus               | 1.0897   | 1.0002   | 0.9903   | 0.9134  | 0.6485   | 1.1122   | 1.0604   | 1.2333  | 1.0094   | 0.8764   | 1.1956   | 0.9676   | 1.0309   | 0.9096   | 0.8117   | 0.8284   | 8622     | 0.28 | 0.29 | 0.30 | 0.23 |
|                    | EP7081.1/AF7081.1/AF7081.1       | CVV       | Obolavirus latent virus 2          | 1.1472   | 0.8733   | 0.9747   | 1.0006  | 0.6802   | 1.1134   | 1.0912   | 1.2905  | 0.9076   | 0.8791   | 1.4004   | 0.9176   | 1.2005   | 0.9714   | 0.81     | 0.8349   | 8301     | 0.25 | 0.27 | 0.31 | 0.24 |
| Average            |                                  |           |                                    | 1.09619  | 0.97160  | 0.9480   | 1.0173  | 0.71833  | 1.0881   | 1.05499  | 1.1717  | 0.93875  | 0.96812  | 1.14633  | 0.9249   | 1.08082  | 0.90237  | 0.882841 | 0.879212 |          |      |      |      |      |
| Standard deviation |                                  |           |                                    | 0.052549 | 0.052026 | 0.052021 | 0.05217 | 0.052034 | 0.052029 | 0.052029 | 0.05217 | 0.052026 | 0.052029 | 0.052029 | 0.052029 | 0.052029 | 0.052029 | 0.052029 | 0.052029 | 0.052029 |      |      |      |      |

|                            |  | Significance | Value     |
|----------------------------|--|--------------|-----------|
| Underrepresented<br>< 0.78 |  |              |           |
|                            |  | **           | 0.78-0.79 |
|                            |  | ***          | <0.72     |
| Overrepresented<br>1.23    |  | **           | 1.23-1.3  |
|                            |  | **           | 1.30-1.5  |
|                            |  | ***          | >1.52     |
